# Supplementary material for: Conditioned medium derived from FGF-2-modified GMSCs enhances migration and angiogenesis of human umbilical vein endothelial cells
Source: PubMed Central journal article supplement (PMC7029497; doi:10.1186/s13287-020-1584-3), 2020-02-18

# Plasmid map

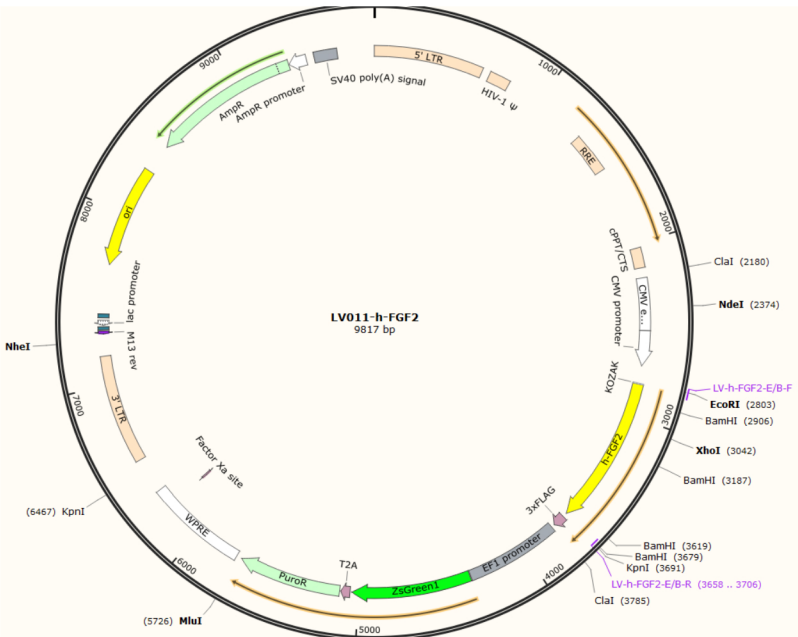

Supplement: 13287_2020_1584_MOESM1_ESM.pdf [file 13287_2020_1584_MOESM1_ESM.pdf]
